# Supplementary material for: A sustainable photocontrolled ATRP strategy: facile separation and recycling of a visible-light-mediated catalyst fac-[Ir(ppy)3]
Source: Royal Society of Chemistry journal article supplement (doi:10.1039/c7py02008b), 2018-01-01
Supplement: c7py02008b1.pdf [file c7py02008b1.pdf]

## Supplementary Information

For

### A sustainable photocontrolled ATRP strategy: Facile separation and recycling of visible light catalyst *fac*-[Ir(ppy)<sub>3</sub>]

Xiaodong Liu,<sup>§1</sup> Yuanyuan Ni,<sup>§1</sup> Jian Wu,<sup>1</sup> Hongjuan Jiang,<sup>1</sup> Zhengbiao Zhang,<sup>\*1</sup> Lifan Zhang,<sup>\*1</sup> Zhenping Cheng,<sup>\*1</sup> Xiulin Zhu<sup>1,2</sup>

<sup>1</sup>Suzhou key Laboratory of Macromolecular Design and Precision Synthesis, Jiangsu Key Laboratory of Advanced Functional Polymer Design and Application, State and Local Joint Engineering Laboratory for Novel Functional Polymeric Materials Department of Polymer Science and Engineering, College of Chemistry, Chemical Engineering and Materials Science, Soochow University, Suzhou 215123, China.

<sup>2</sup>Global Institute of Soft Technology, No. 5 Qingshan Road, Suzhou National Hi-Tech District, Suzhou 215163, China.

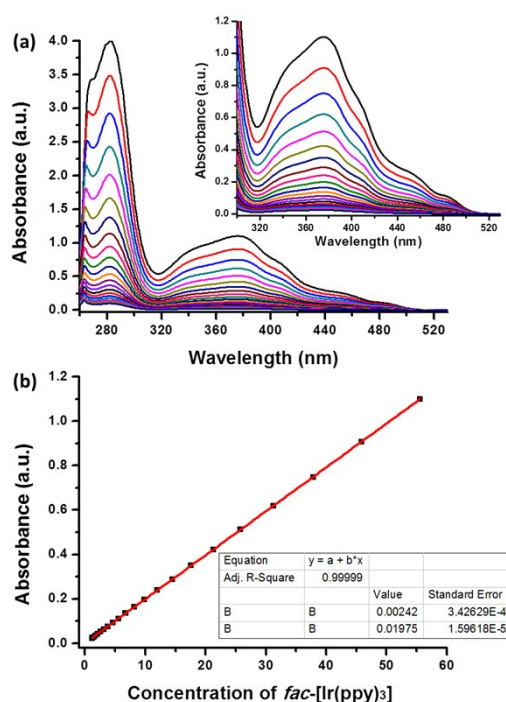

**Figure S1.** (a) Absorbance spectra of *fac*-[Ir(ppy)<sub>3</sub>] at different concentrations in DMF, (b) absorbance intensity of *fac*-[Ir(ppy)<sub>3</sub>] of different concentrations (μg mL<sup>-1</sup>) at 378 nm.
